# Supplementary material
Source: publisher figshare collection journal article supplement (https://gsapubs.figshare.com/ndownloader/files/30991657)
Supplement: Supplementary file 1 [file 30991657]

## Sheet: Sheet1
Samples dated using SIMS SHRIMP method
Sample (grain, spot)	% 206Pbc	U, ppm	Th, ppm	232Th/238U	206Pb*, ppm	(1) 206Pb/238U Age		(1) 207Pb*/206Pb*	±2σ	(1) 207Pb*/235U	±2σ	(1) 206Pb*/238U	±2σ	err corr		TabS1
118-11																Kurapov, M., Ershova, V., Khudoley, A., Luchitskaya, M., Stockli, D., Makariev, A.,
1.1	0.521902	123.582	147.406	1.23246	5.11	301.5	±4.3	0.0502	0.0072288	0.331	0.048326	0.04788	0.00134064	0.197897		Makarieva, E., and Vishnevskaya, I., 2021, Latest Permian–Triassic Magmatism of the
2.1	0.510689	471.18	202.841	0.444817	16.3	252.8	±3.1	0.0513	0.0054378	0.283	0.030564	0.03999	0.00103974	0.231742		Taimyr Peninsula: New evidence for a connection to the Siberian Traps large igneous
3.1	0.778006	366.688	87.8099	0.247434	13	258	±3.4	0.0516	0.0078432	0.291	0.045396	0.04084	0.00106184	0.171459		province: Geosphere, v. 17, https://doi.org/10.1130/GES02421.1.
4.1	0.848709	315.644	178.478	0.58425	10.1	232.7	±3.1	0.0528	0.0085536	0.267	0.043788	0.03676	0.00102928	0.16549
5.1	1.29665	672.05	236.139	0.363061	21	227.4	±2.8	0.054	0.007236	0.268	0.036448	0.03591	0.00093366	0.184014
6.1	0.485162	548.426	229.422	0.432244	18.6	248.8	±2.9	0.0512	0.00512	0.278	0.028356	0.03935	0.0009444	0.231365
192-2
1.1	0.244191	686.752	421.864	0.634724	8.56	92.62	±0,63	0.0468	0.0035568	0.0934	0.0072852	0.014472	0.000199714	0.1772
1.2	0.199728	876.976	442.887	0.521817	10.7	90.75	±0,59	0.048	0.004032	0.0938	0.0078792	0.014177	0.000187136	0.155371
2.1	1.33483	543.406	470.513	0.894663	18.2	243.6	±1,5	0.0502	0.0059236	0.267	0.03204	0.03851	0.000492928	0.106798
3.1	1.83464e-29	78.3102	56.1838	0.741319	2.47	232	±2,1	0.0504	0.0041328	0.254	0.021336	0.03664	0.000688832	0.220921
4.1	0.62087	91.0213	36.427	0.413517	7.21	565.1	±5,6	0.0579	0.0067164	0.732	0.086376	0.09163	0.0018326	0.174706
5.1	0.139642	338.699	167.337	0.510494	10.8	233.7	±1,8	0.0528	0.0049632	0.269	0.025824	0.03692	0.000575952	0.162693
6.1	0.186875	422.617	239.44	0.585413	14.2	246.8	±1,5	0.0487	0.0031168	0.2622	0.0167808	0.03903	0.00046836	0.187431
7.1	0.318732	648.033	1020.53	1.62721	9.44	108.03	±0,74	0.0472	0.0038704	0.11	0.00924	0.0169	0.0002366	0.165221
8.1	0	252.281	55.5191	0.227389	8.1	236.7	±1,8	0.0522	0.0030276	0.2693	0.016158	0.03741	0.000576114	0.258909
9.1	0.333562	352.226	128.247	0.376216	11.4	236.9	±1,6	0.0495	0.003564	0.2552	0.0188848	0.03742	0.000508912	0.183167
192-3
1.1	0.512542	159.797	54.5342	0.352625	5.31	243.3	±5	0.0518	0.006734	0.275	0.0374	0.03846	0.00161532	0.309727
2.1	0.560248	1317.28	743.602	0.583277	41	227.9	±3,9	0.0529	0.0032798	0.2626	0.0189072	0.03599	0.00122366	0.487354
3.1	0.199974	734.636	517.699	0.728146	24.6	246.4	±4,4	0.0515	0.002781	0.2766	0.0182556	0.03897	0.00140292	0.551421
4.1	0.356584	321.266	383.984	1.23498	10.6	241	±4,7	0.0483	0.00483	0.254	0.027432	0.0381	0.001524	0.365208
5.1	0.470009	570.128	428.678	0.776912	18.3	235.3	±4,3	0.0509	0.007126	0.261	0.037584	0.03718	0.00133848	0.255341
6.1	0.105271	1548.7	488.765	0.326096	50.8	241.3	±4,1	0.05072	0.00172448	0.2667	0.0128016	0.03813	0.00129642	0.717144
6.2	0.379007	297.243	53.8308	0.187125	9.79	241.7	±4,6	0.0492	0.0051168	0.259	0.02849	0.03821	0.00145198	0.348258
7.1	0.3576	316.903	176.514	0.575528	9.83	227.9	±4,4	0.0498	0.0048804	0.247	0.026182	0.03599	0.0014396	0.37144
8.1	0.402051	209.986	26.0623	0.128244	6.74	235.7	±4,4	0.0503	0.005533	0.258	0.029928	0.03724	0.00141512	0.328511
9.1	0.10168	820.712	337.508	0.424919	26.9	241.4	±4,1	0.0524	0.0022008	0.2759	0.0154504	0.03816	0.00137376	0.635415
Errors are 2-sigma; Pbc and Pb* indicate the common and radiogenic portions, respectively.
Error in Standard calibration was 0.46%( not included in above errors but required when comparing data from different mounts).
(1) Common Pb corrected using measured 204Pb.
Samples dated using LA-ICP-MS method
Sample (grain, spot)	U, ppm	Th, ppm	232Th/238U	Pb, ppm	206Pb/238U Age		207Pb/206Pb	±2σ	207Pb/235U	±2σ	206Pb/238U	±2σ	err corr
111-1*
111-1-01	1459.75	1045.58	0.716271	59.2029	231.52	3.88105	0.0516416	0.00113648	0.260371	0.00506056	0.0365672	0.00062416	0.623998
111-1-02	210.64	248.504	1.17976	9.62995	233.737	4.20152	0.0509624	0.0017384	0.259452	0.00834442	0.0369238	0.00067594	0.596775
111-1-03	360.742	293.033	0.812305	15.1825	235.777	4.03257	0.0519073	0.0014298	0.266612	0.00673096	0.037252	0.00064896	0.607796
111-1-04	423.822	562.06	1.32617	20.072	234.861	4.00866	0.0524166	0.00138476	0.268163	0.00646116	0.0371046	0.00064502	0.610978
111-1-05	1894.93	1255.28	0.662444	74.752	228.976	3.87176	0.0522116	0.00114634	0.260301	0.00507096	0.0361582	0.00062242	0.62577
111-1-06	548.128	800.604	1.46062	26.5268	234.444	4.00469	0.0514568	0.0012994	0.262776	0.00602808	0.0370375	0.00064434	0.615056
111-1-07	697.661	1181.54	1.69358	35.1849	233.038	3.96404	0.0536521	0.00131686	0.272314	0.00603584	0.0368113	0.00063766	0.616733
111-1-08	562.924	861.537	1.53047	27.2724	233.125	3.99581	0.0526949	0.00133174	0.267558	0.00614914	0.0368254	0.00064278	0.61545
111-1-09	308.702	421.031	1.36387	14.6887	233.33	4.35132	0.0521299	0.00142	0.264926	0.00696	0.0368584	0.0007	0.624392
111-1-10	1035.65	539.938	0.521351	40.9045	235.356	4.34995	0.0551275	0.00132	0.282637	0.0063	0.0371842	0.0007	0.632123
111-1-11	566.306	877.324	1.5492	28.3404	235.746	4.47394	0.051839	0.00126	0.266226	0.00622	0.0372471	0.00072	0.637275
111-1-12	124.486	79.1234	0.635602	5.03208	235.724	4.84671	0.0510865	0.00224	0.262336	0.01126	0.0372434	0.00078	0.593098
111-1-13	147.486	138.421	0.938539	6.32051	229.493	4.47828	0.0536199	0.00192	0.267936	0.00924	0.0362413	0.00072	0.602949
111-1-14	573.095	885.334	1.54483	28.5834	235.125	4.35011	0.0516954	0.00126	0.264776	0.0062	0.0371471	0.0007	0.634283
111-1-15	3395.35	2431.33	0.716078	148.632	248.883	4.58883	0.0527636	0.00116	0.286367	0.00588	0.0393629	0.00074	0.641589
111-1-16	145.536	118.008	0.81085	6.20755	237.332	4.59706	0.0525965	0.00182	0.271966	0.00912	0.0375022	0.00074	0.606317
111-1-17	135.443	115.587	0.8534	5.773	234.223	4.59928	0.0516905	0.00188	0.263716	0.00926	0.0370019	0.00074	0.60254
111-1-18	222.576	174.515	0.784068	9.24744	233.169	4.47573	0.0510403	0.00156	0.259206	0.00764	0.0368324	0.00072	0.616119
111-1-19	307.252	284.221	0.92504	13.297	233.598	4.35114	0.0531678	0.00148	0.270516	0.00724	0.0369014	0.0007	0.621744
111-1-20	94.8604	61.7348	0.650797	3.87428	237.215	4.72137	0.0512356	0.00214	0.264796	0.0108	0.0374833	0.00076	0.593946
91500-1275	91.8125	29.5293	0.321627	16.6244	1009.39	47.6246	0.0728359	0.0017105	1.79916	0.0380945	0.179153	0.0031449	0.62255
91500-1276	95.9653	30.9934	0.322964	17.4692	1033.6	50.4268	0.0737124	0.00183968	1.82969	0.0415789	0.180026	0.00318726	0.618349
91500-1277	89.1514	29.4098	0.329887	16.232	1086.65	49.2636	0.0756811	0.00186	1.86689	0.04342	0.178908	0.00342	0.632959
91500-1278	88.7326	28.7418	0.323915	16.1383	1079.66	51.6157	0.0754178	0.00194	1.86757	0.0459	0.179598	0.00348	0.630879
StdGJ-1	359.189	10.6812	0.0297371	32.3682	602.633	9.89261	0.0604052	0.00131778	0.816146	0.0157668	0.0979924	0.00168568	0.626103
StdGJ-1	361.965	10.8985	0.0301094	32.6109	602.729	10.915	0.0601409	0.00138	0.81271	0.01758	0.0980087	0.00186	0.639026
StdGJ-2	380.81	11.3183	0.0297216	34.0323	598.333	9.81926	0.0598386	0.00130054	0.80245	0.0154312	0.0972603	0.00167206	0.626344
StdGJ-2	378.055	11.1018	0.0293656	33.8056	598.441	10.8049	0.0601076	0.00136	0.80621	0.01738	0.0972787	0.00184	0.641496
StdGJ-3	371.554	10.9776	0.029545	33.4107	601.559	9.99224	0.0604557	0.00143448	0.815305	0.0174233	0.0978095	0.00170238	0.620444
StdGJ-3	374.551	11.2	0.0299025	33.3481	595.914	10.9265	0.0603737	0.00148	0.8062	0.0187	0.0968487	0.00186	0.633747
StdGJ-4	368.446	11.0224	0.029916	33.0106	599.604	9.97614	0.0598349	0.00143482	0.804186	0.0174016	0.0974767	0.00169912	0.619739
StdGJ-4	365.437	10.7992	0.0295516	33.0609	605.194	11.0281	0.0598828	0.00146	0.81269	0.01898	0.0984287	0.00188	0.635309
118-6*
118-6-02	693.957	121.072	0.174466	25.576	244.749	4.59178	0.0532953	0.00124	0.284357	0.0063	0.0386967	0.00074	0.639663
118-6-03	673.251	268.25	0.39844	26.6003	245.67	4.59112	0.0527742	0.00124	0.282657	0.0063	0.0388451	0.00074	0.637733
118-6-04	693.218	251.774	0.363196	27.0988	245.113	4.59152	0.0527168	0.00122	0.281697	0.00628	0.0387554	0.00074	0.641493
118-6-05	575.76	153.14	0.265979	22.0605	247.414	4.71391	0.0516204	0.00126	0.278477	0.00658	0.039126	0.00076	0.638293
118-6-06	786.252	434.036	0.552032	32.5736	246.408	4.5906	0.0538733	0.00124	0.289427	0.00638	0.038964	0.00074	0.640788
118-6-07	1058.95	435.815	0.411554	43.726	254.909	5.57558	0.0546261	0.00192	0.303798	0.01066	0.040335	0.0009	0.620349
118-6-08	1108.77	519.104	0.468181	43.468	235.545	4.47408	0.058998	0.00132	0.302728	0.00646	0.0372146	0.00072	0.645314
118-6-09	247.721	62.0832	0.250618	9.40669	246.794	4.71436	0.0525666	0.0015	0.282857	0.00778	0.0390262	0.00076	0.62225
118-6-10	722.719	257.146	0.355803	28.4097	247.844	4.71359	0.0512496	0.00122	0.276966	0.00626	0.0391954	0.00076	0.638319
118-6-11	810.54	294.616	0.363482	33.9406	262.776	4.95015	0.0533365	0.00124	0.305968	0.00678	0.0416054	0.0008	0.640393
118-6-13	1010.91	551.417	0.545466	39.1131	231.562	4.35251	0.0539749	0.00126	0.272186	0.006	0.0365741	0.0007	0.638316
118-6-14	454.145	152.751	0.33635	17.9623	248.775	5.2089	0.0523573	0.00178	0.284037	0.00958	0.0393456	0.00084	0.618451
118-6-15	882.354	489.035	0.554239	33.5482	228.887	4.22993	0.055173	0.00132	0.274956	0.00624	0.036144	0.00068	0.6345
118-6-16	909.934	321.38	0.35319	35.5375	245.983	4.83901	0.0520309	0.00136	0.279037	0.0071	0.0388954	0.00078	0.635279
118-6-17	526.316	268.077	0.509346	21.5886	246.1	4.71487	0.0547175	0.00142	0.293587	0.0074	0.0389143	0.00076	0.632984
118-6-18	1050.6	421.145	0.400863	40.4764	237.847	4.47248	0.0566739	0.00132	0.293697	0.00654	0.0375851	0.00072	0.640232
118-6-19	3285.08	4074.42	1.24028	80.0318	90.6348	2.03389	0.223759	0.0084	0.436834	0.01624	0.014159	0.00032	0.614476
118-6-20	665.226	240.146	0.360999	25.5122	241.699	4.59395	0.0523822	0.00128	0.275936	0.00646	0.0382054	0.00074	0.636605
118-6-21	283.246	128.977	0.455351	11.5525	249.08	5.20866	0.0511321	0.00186	0.277737	0.00996	0.0393947	0.00084	0.611346
118-6-22	723.141	503.171	0.695813	31.6603	249.442	4.71242	0.0518672	0.00128	0.282147	0.00666	0.0394531	0.00076	0.634763
91500-1283	94.7396	30.3399	0.320245	16.8793	1042.63	19.5474	0.0751205	0.0018	1.82084	0.04154	0.175798	0.00338	0.637005
91500-1284	93.6067	31.0939	0.332176	17.0273	1062.31	20.2626	0.073959	0.00186	1.82491	0.0441	0.178958	0.0035	0.634898
91500-1285	97.0409	32.4494	0.334389	17.623	1064.02	20.2847	0.0732791	0.00186	1.80955	0.04412	0.179098	0.0035	0.633819
StdGJ-1	362.962	10.69	0.0294522	32.6971	602.695	11.1917	0.0600217	0.00134	0.8111	0.01726	0.0980087	0.00186	0.643372
StdGJ-2	377.045	11.3106	0.0299979	33.7087	597.976	11.192	0.060241	0.00134	0.80775	0.01714	0.0972487	0.00186	0.644673
StdGJ-3	372.579	11.1504	0.0299277	33.5047	601.742	11.4404	0.0598527	0.00144	0.80733	0.01856	0.0978287	0.0019	0.638108
StdGJ-4	367.418	10.8493	0.0295284	32.9125	599.061	11.4362	0.0603935	0.00146	0.81146	0.01876	0.0974487	0.0019	0.638149
170-7*
170-7-01	715.18	231.774	0.324077	27.5309	243.191	6.45439	0.0532679	0.00148	0.282367	0.0092	0.0384456	0.00104	0.68232
170-7-02	797.783	256.135	0.321058	29.5957	235.178	6.21392	0.0509418	0.00138	0.260976	0.00834	0.0371556	0.001	0.68496
170-7-03	790.66	488.105	0.617339	33.038	233.176	5.96728	0.0730929	0.00178	0.371211	0.01088	0.0368336	0.00096	0.694736
170-7-04	755.961	276.552	0.365829	28.1601	228.522	5.72283	0.0576988	0.00154	0.287077	0.00878	0.0360853	0.00092	0.677681
170-7-05	911.079	393.392	0.431786	34.5443	232.251	5.96813	0.0530408	0.00128	0.268286	0.00774	0.0366849	0.00096	0.695251
170-7-06	1276.04	588.557	0.461236	47.8315	226.962	5.72421	0.0528501	0.00128	0.261126	0.00748	0.0358346	0.00092	0.691808
170-7-08	678.226	232.008	0.34208	26.6089	247.162	6.3264	0.0514086	0.00128	0.277046	0.00822	0.0390855	0.00102	0.691487
170-7-09	591.288	191.527	0.323915	22.6003	243.377	6.33011	0.0528587	0.00142	0.280417	0.00888	0.0384756	0.00102	0.684257
170-7-10	825.498	309.324	0.374712	31.2713	233.622	5.96686	0.0595633	0.00144	0.303088	0.00882	0.0369053	0.00096	0.695213
170-7-11	435.853	117.467	0.26951	15.8083	233.626	5.96686	0.0508069	0.00142	0.258536	0.00826	0.036906	0.00096	0.674841
170-7-12	931.92	298.501	0.320307	35.3925	241.08	6.20823	0.0511012	0.00124	0.268486	0.00786	0.0381057	0.001	0.696
170-7-13	1121.25	449.527	0.400917	44.089	234.802	5.96577	0.0665164	0.00166	0.340209	0.00992	0.0370951	0.00096	0.688194
170-7-14	823.69	368.731	0.447658	32.1823	239.957	6.20932	0.0549882	0.00138	0.287537	0.00854	0.0379248	0.001	0.690945
170-7-15	1074.11	392.164	0.365106	40.5689	236.606	6.21255	0.0517405	0.0014	0.266706	0.0085	0.0373853	0.001	0.684372
170-7-16	791.807	367.489	0.464115	28.96	218.991	5.60673	0.0673703	0.00182	0.320978	0.00996	0.0345546	0.0009	0.678901
91500-1750	72.8827	22.0177	0.302097	13.2688	1061.22	26.9899	0.0746001	0.00194	1.84033	0.05594	0.178918	0.00468	0.685086
91500-1751	76.6752	23.5063	0.30657	13.7976	1059.08	27.3535	0.0744878	0.00206	1.83345	0.05848	0.178518	0.00474	0.678865
StdGJ-1	371.953	10.9995	0.0295723	33.0783	595.569	15.0248	0.0600111	0.00138	0.80111	0.02252	0.0968187	0.0025	0.701171
StdGJ-2	368.039	11.0005	0.0298895	33.3367	605.355	15.3696	0.0602287	0.00138	0.8178	0.02292	0.0984787	0.00256	0.702283
StdGJ-3	380.873	11.3262	0.0297374	34.3059	602.719	15.5027	0.0599899	0.0015	0.81067	0.02418	0.0980087	0.00258	0.691964
StdGJ-4	359.076	10.6723	0.0297215	32.0927	597.72	15.5036	0.0602635	0.00152	0.80772	0.02428	0.0972087	0.00258	0.691832
68002**
68002-1	909	74.3	10.38	-	227.3	2.4	0.05133	0.00088	0.2538	0.0046	0.03588	0.00039	0.39716
68002-2	769.3	404	1.601	-	227.9	2.4	0.05088	0.00088	0.2523	0.0046	0.03598	0.00039	0.3815
68002-3	446	477	0.799	-	227.7	3.1	0.0515	0.0016	0.2548	0.007	0.03595	0.0005	0.028683
68002-4	374	320	0.979	-	249.2	2.6	0.0606	0.0032	0.33	0.019	0.03942	0.00043	0.65837
68002-5	650	358	1.508	-	292.6	4.8	0.0686	0.0027	0.44	0.019	0.04643	0.00077	0.36277
68002-6	432	255.1	1.41	-	231.4	2.2	0.052	0.0014	0.2628	0.007	0.03655	0.00035	0.1028
68002-7	608	944	0.544	-	225.4	2.6	0.0514	0.0011	0.2529	0.0057	0.03559	0.00042	0.34506
68002-8	864	1000	0.928	-	209.5	2.7	0.053	0.001	0.2411	0.0051	0.03303	0.00043	0.32759
68002-9	318	60.5	4.79	-	261.4	3.4	0.0519	0.0016	0.2967	0.009	0.04139	0.00056	0.30831
68002-10	896	809	0.939	-	254.7	4.4	0.0995	0.007	0.558	0.047	0.0403	0.00071	0.692
68002-11	580	105.1	5.21	-	252.4	2.9	0.05138	0.00083	0.2836	0.0055	0.03993	0.00047	0.53777
68002-12	936	501	1.611	-	269.5	6.5	0.0554	0.0011	0.3262	0.0093	0.0427	0.001	0.18967
68002-13	306	347	0.778	-	241.6	3.6	0.0629	0.0017	0.331	0.01	0.03819	0.00058	0.43289
68002-14	622	473	1.182	-	239.9	3.6	0.0527	0.0011	0.273	0.0059	0.03792	0.00059	0.41078
68002-15	523	1260	0.36	-	265.2	3.2	0.0521	0.001	0.3016	0.0061	0.042	0.00051	0.41795
68002-16	731	538	1.236	-	242.9	3.3	0.07	0.0035	0.367	0.02	0.0384	0.00053	0.49288
68002-17	1135	1350	0.802	-	237.7	2	0.0544	0.0013	0.2821	0.0084	0.03756	0.00031	0.61211
68002-18	996	808	1.066	-	254.5	1.9	0.05258	0.00073	0.2901	0.0036	0.04028	0.0003	0.12576
68002-19	349	270	1.257	-	253.8	3.7	0.0581	0.0013	0.3188	0.0078	0.04016	0.00061	0.39983
68002-20	1372	1560	1.05	-	241.7	3.2	0.0706	0.0032	0.367	0.014	0.03821	0.00051	0.40744
68002-21	885	821	0.982	-	226.8	3.8	0.082	0.0042	0.403	0.022	0.03582	0.00061	0.34466
68002-22	451	531	0.744	-	236.6	6.3	0.0539	0.0018	0.2725	0.0096	0.0374	0.001	0.49769
68002-23	512	558	0.881	-	229.9	2.4	0.0538	0.0011	0.2668	0.0051	0.03631	0.00039	0.11938
68002-24	1311	664	1.731	-	249.5	2.1	0.05202	0.00077	0.2817	0.0045	0.03947	0.00035	0.38936
68002-25	1211	1257	0.935	-	251.1	2.5	0.1094	0.005	0.596	0.03	0.03972	0.00041	0.54056
68002-26	938	743	1.188	-	230.1	1.9	0.059	0.0016	0.2963	0.008	0.03635	0.00031	0.2159
68002-27	1053	794	1.15	-	243	2.3	0.0675	0.0017	0.358	0.01	0.03841	0.00038	0.54666
68002-28	1078	870	1.111	-	241.9	3.8	0.0551	0.0019	0.291	0.011	0.03824	0.00062	0.26443
68002-29	578.4	338.6	1.445	-	260.9	3.9	0.0528	0.0016	0.3002	0.0092	0.0413	0.00063	0.30769
68002-30	781	880	0.758	-	238.8	5.4	0.0565	0.0014	0.2929	0.0072	0.03775	0.00087	0.49203
Plesovice_2	665	80.7	7.123	-	338.7	2.2	0.05327	0.00072	0.3969	0.0053	0.05395	0.00035	0.23302
Plesovice_3	682	81.3	7.124	-	338.2	2.2	0.05366	0.00066	0.3975	0.0048	0.05386	0.00036	0.31358
GJ1_17	383	9	43.1	-	601.2	5.2	0.06001	0.00074	0.81	0.01	0.09777	0.00089	0.4009
GJ1_18	388.1	8	47	-	600.2	5	0.05988	0.00069	0.807	0.01	0.0976	0.00086	0.50262
GJ1_19	380.7	8	47.6	-	601.5	5.6	0.06037	0.00079	0.813	0.01	0.09781	0.00095	0.30112
GJ1_20	388	8	43.9	-	597.5	5.8	0.06057	0.00087	0.805	0.012	0.09713	0.00099	0.35696
*dating was performed in the Vernadsky Institute of Geochemistry and Analytical Chemistry of the Russian Academy of Sciences
**dating was performed in the UTChron geochronology facility in the Department of Geosciences at the University of Texas, Austin
